# Supplementary material
Source: PubMed Central journal article supplement (PMC9897628)
Supplement: 41576_2022_568_MOESM1_ESM.pdf [file 41576_2022_568_MOESM1_ESM.pdf]

---

# Human-specific genetics: new tools to explore the molecular and cellular basis of human evolution

---

In the format provided by the authors and unedited

---

**Supplementary table S1: A list of non-human great ape and primate PSC lines established**

| <b>Year</b> | <b>Study</b>             | <b>Species</b>         | <b>Number of PSC lines</b> | <b>References</b> |
|-------------|--------------------------|------------------------|----------------------------|-------------------|
| 2013        | Marchetto et al.         | <i>Pan troglodytes</i> | 2                          | 1                 |
| 2014        | Fujie et al.             | <i>Pan troglodytes</i> | 2                          | 2                 |
| 2015        | Romero et al.            | <i>Pan troglodytes</i> | 7                          | 3                 |
| 2016        | Mora Bermudez et al.     | <i>Pan troglodytes</i> | 1                          | 4                 |
| 2017        | Hemmi et al.             | <i>Pan troglodytes</i> | 1                          | 5                 |
| 2018        | Pavlovic et al.          | <i>Pan troglodytes</i> | 2                          | 6                 |
| 2019        | Pollen et al.            | <i>Pan troglodytes</i> | 4                          | 7                 |
| 2019        | Kanton et al.            | <i>Pan troglodytes</i> | 1                          | 8                 |
| 2019        | Field et al.             | <i>Pan troglodytes</i> | 1                          | 9                 |
| 2014        | Wunderlich               | <i>Pan paniscus</i>    | 1                          | 10                |
| 2019        | Kanton et al.            | <i>Pan paniscus</i>    | 1                          | 8                 |
| 2013        | Navara et al.            | <i>Papio anubis</i>    | 2                          | 11                |
| 2015        | Ramaswamy et al.         | <i>Pongo abelii</i>    | 2                          | 12                |
| 2016        | Mora Bermudez et al.     | <i>Pongo abelii</i>    | 1                          | 4                 |
| 2019        | Field et al.             | <i>Pongo abelii</i>    | 1                          | 9                 |
| 2021        | Geuder et al.            | <i>Pongo abelii</i>    | 2                          | 13                |
| 2014        | Wunderlich et al.        | <i>Gorilla gorilla</i> | 1                          | 10                |
| 2021        | Benito-Kwiecinski et al. | <i>Gorilla gorilla</i> | 1                          | 14                |
| 2021        | Geuder et al.            | <i>Gorilla gorilla</i> | 1                          | 13                |
| 1995        | Thomson et al.           | <i>Macaca mulatta</i>  | 1                          | 15                |
| 2006        | Mitalipov et al.         | <i>Macaca mulatta</i>  | 18                         | 16                |

|      |                   |                               |    |    |
|------|-------------------|-------------------------------|----|----|
| 2001 | Suemori et al     | <i>Macaca fascicularis</i>    | 4  | 17 |
| 2012 | Wunderlich et al. | <i>Macaca fascicularis</i>    | 3  | 18 |
| 2014 | Wunderlich        | <i>Macaca fascicularis</i>    | 1  | 10 |
| 2016 | Otani et al.      | <i>Macaca fascicularis</i>    | 2  | 19 |
| 2016 | Otani et al.      | <i>Macaca nemestrina</i>      | 1  | 19 |
| 2011 | Ben-Nun et al.    | <i>Mandrillus leucophaeus</i> | 1  | 20 |
| 2017 | Hemmi et al.      | <i>Callithrix jacchus</i>     | 4  | 5  |
| 2020 | Chung et al.      | <i>Chlorocebus sabaeus</i>    | 11 | 21 |

PSC, pluripotent stem cell

### Supplementary References

1. Marchetto, M. C. N. *et al.* Differential L1 regulation in pluripotent stem cells of humans and apes. *Nature* **503**, 525–529 (2013).
2. Fujie, Y. *et al.* New type of Sendai virus vector provides transgene-free iPS cells derived from chimpanzee blood. *PLoS One* **9**, e113052 (2014).
3. Gallego Romero, I. *et al.* A panel of induced pluripotent stem cells from chimpanzees: a resource for comparative functional genomics. *Elife* **4**, e07103 (2015).
4. Mora-Bermúdez, F. *et al.* Differences and similarities between human and chimpanzee neural progenitors during cerebral cortex development. *Elife* **5**, (2016).
5. Hemmi, J. J., Mishra, A. & Hornsby, P. J. Overcoming barriers to reprogramming and differentiation in nonhuman primate induced pluripotent stem cells. *Primate Biol* **4**, 153–162 (2017).
6. Pavlovic, B. J., Blake, L. E., Roux, J., Chavarria, C. & Gilad, Y. A Comparative Assessment

- of Human and Chimpanzee iPSC-derived Cardiomyocytes with Primary Heart Tissues. *Sci. Rep.* **8**, 15312 (2018).
7. Pollen, A. A. *et al.* Establishing Cerebral Organoids as Models of Human-Specific Brain Evolution. *Cell* **176**, 743–756.e17 (2019).
  8. Kanton, S. *et al.* Organoid single-cell genomic atlas uncovers human-specific features of brain development. *Nature* **574**, 418–422 (2019).
  9. Field, A. R. *et al.* Structurally Conserved Primate LncRNAs Are Transiently Expressed during Human Cortical Differentiation and Influence Cell-Type-Specific Genes. *Stem Cell Reports* **12**, 245–257 (2019).
  10. Wunderlich, S. *et al.* Primate iPS cells as tools for evolutionary analyses. *Stem Cell Res.* **12**, 622–629 (2014).
  11. Navara, C. S. *et al.* Derivation of induced pluripotent stem cells from the baboon: a nonhuman primate model for preclinical testing of stem cell therapies. *Cell. Reprogram.* **15**, 495–502 (2013).
  12. Ramaswamy, K. *et al.* Derivation of induced pluripotent stem cells from orangutan skin fibroblasts. *BMC Res. Notes* **8**, 577 (2015).
  13. Geuder, J. *et al.* A non-invasive method to generate induced pluripotent stem cells from primate urine. *Sci. Rep.* **11**, 3516 (2021).
  14. Benito-Kwiecinski, S. *et al.* An early cell shape transition drives evolutionary expansion of the human forebrain. *Cell* **184**, 2084–2102.e19 (2021).
  15. Thomson, J. A. *et al.* Isolation of a primate embryonic stem cell line. *Proc. Natl. Acad. Sci. U. S. A.* **92**, 7844–7848 (1995).
  16. Mitalipov, S. *et al.* Isolation and characterization of novel rhesus monkey embryonic stem cell lines. *Stem Cells* **24**, 2177–2186 (2006).
  17. Suemori, H. *et al.* Establishment of embryonic stem cell lines from cynomolgus monkey blastocysts produced by IVF or ICSI. *Dev. Dyn.* **222**, 273–279 (2001).

18. Wunderlich, S. *et al.* Induction of pluripotent stem cells from a cynomolgus monkey using a polycistronic simian immunodeficiency virus-based vector, differentiation toward functional cardiomyocytes, and generation of stably expressing reporter lines. *Cell. Reprogram.* **14**, 471–484 (2012).
19. Otani, T., Marchetto, M. C., Gage, F. H., Simons, B. D. & Livesey, F. J. 2D and 3D Stem Cell Models of Primate Cortical Development Identify Species-Specific Differences in Progenitor Behavior Contributing to Brain Size. *Cell Stem Cell* **18**, 467–480 (2016).
20. Ben-Nun, I. F. *et al.* Induced pluripotent stem cells from highly endangered species. *Nat. Methods* **8**, 829–831 (2011).
21. Chung, Y. G., Seay, M., Elsworth, J. D. & Redmond, D. E. Generation of Pluripotent Stem Cells Using Somatic Cell Nuclear Transfer and Induced Pluripotent Somatic Cells from African Green Monkeys. *Stem Cells Dev.* **29**, 1294–1307 (2020).
